# Supplementary material for: Effect of Sowing Date and Environment on Phenology, Growth and Yield of Lentil (Lens culinaris Medikus.) Genotypes
Source: MDPI journal article supplement (doi:10.3390/plants12030474), 2023-01-19
Supplement: s1 [file s1]

**Trangie Agricultural Research Centre climate 2018 (a)**

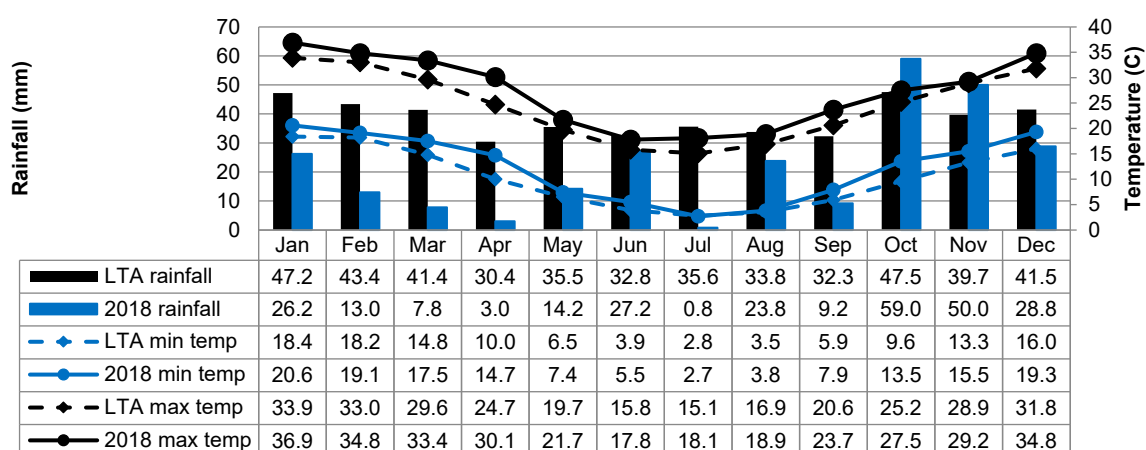

**Trangie Agricultural Research Centre climate 2019 (b)**

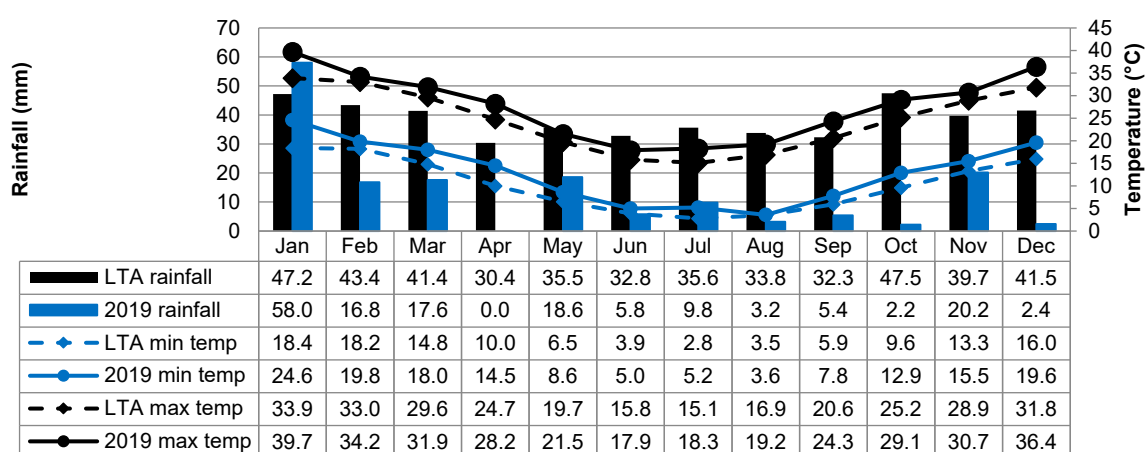

**Wagga Wagga Agricultural Institute climate 2018 (c)**

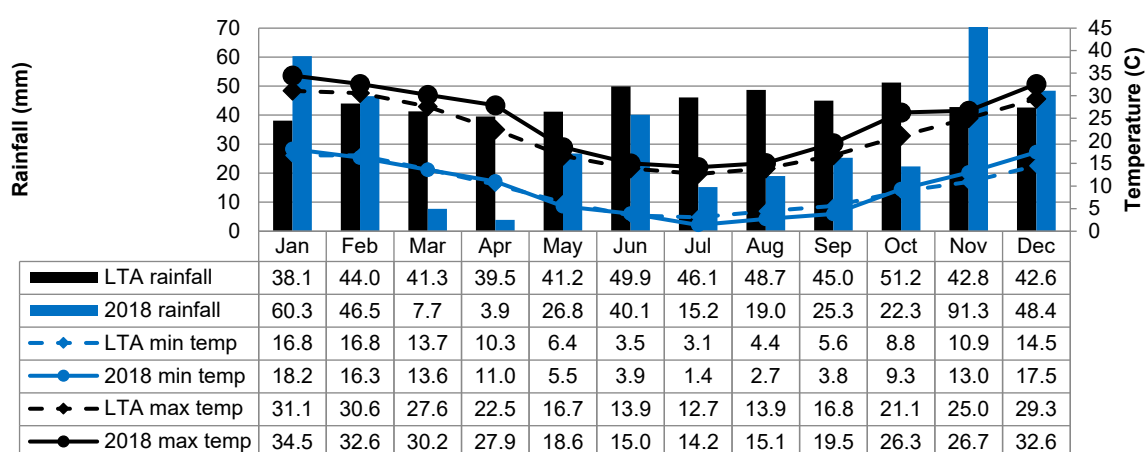

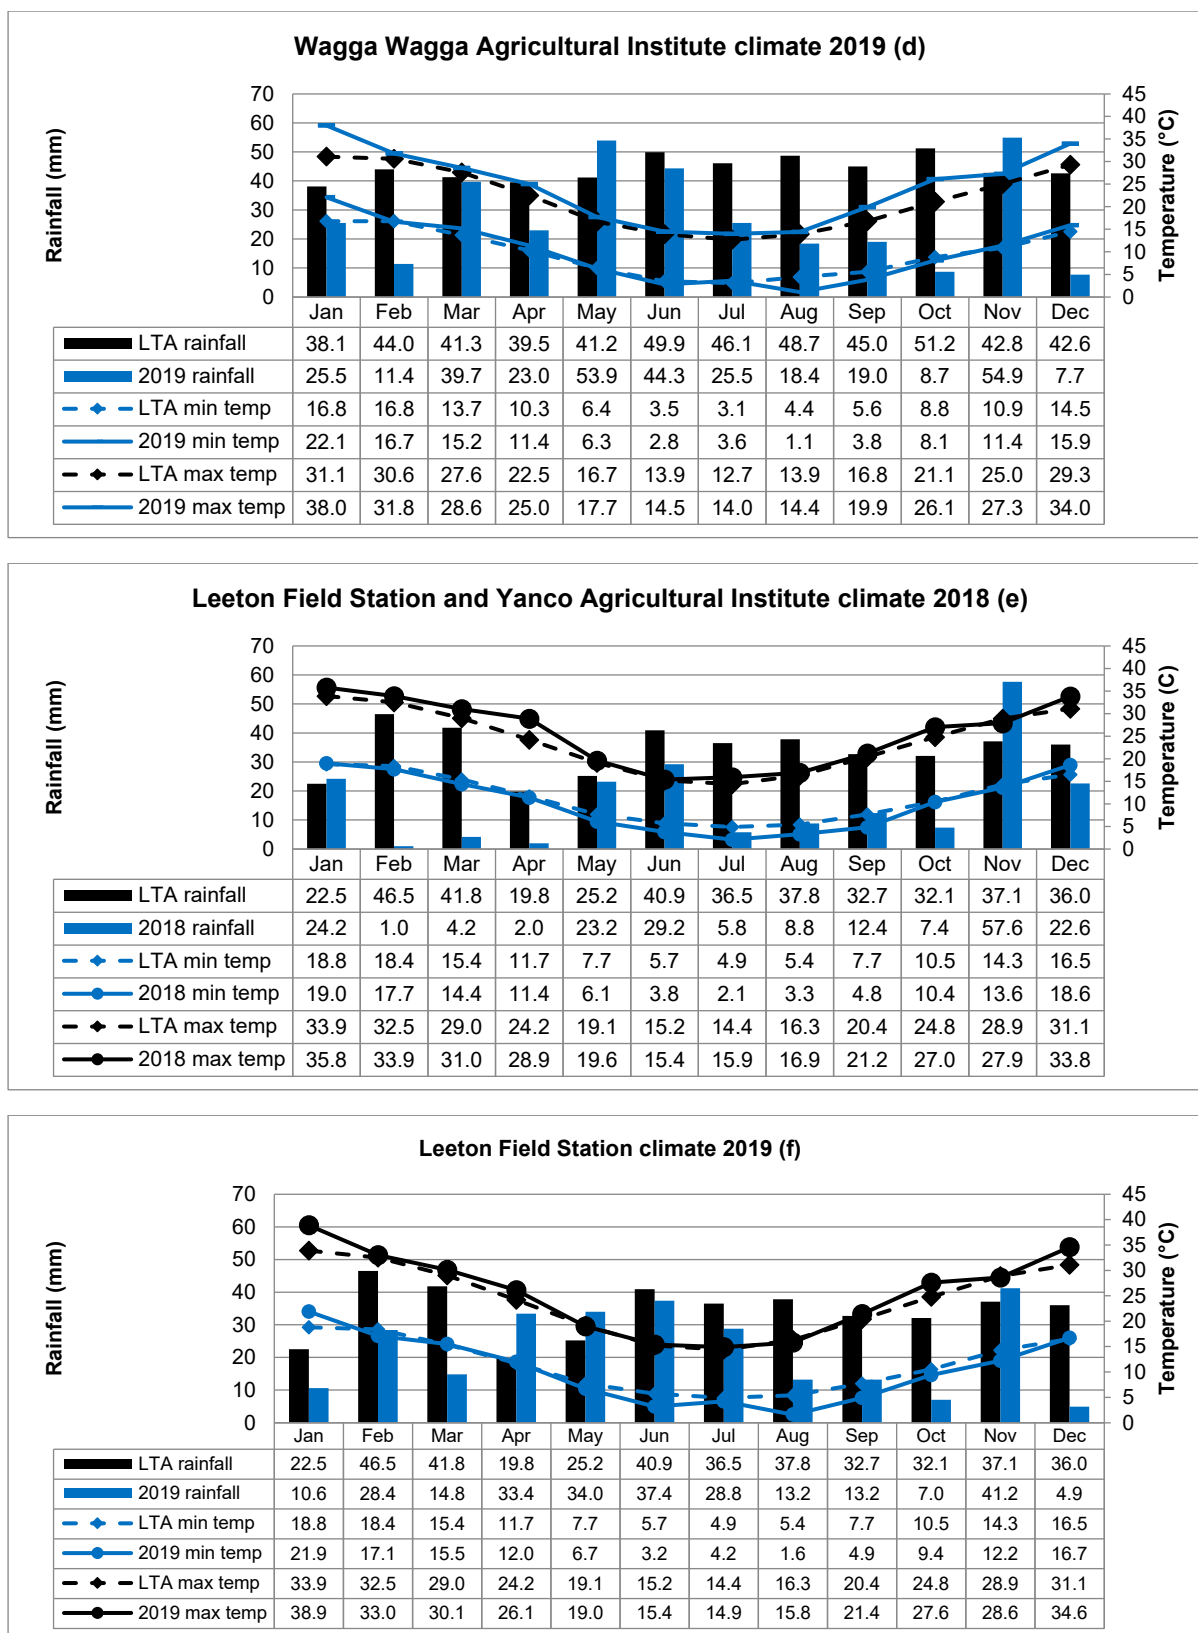

**Figure S1. (a-f)** Rainfall, minimum (min) and maximum (max) temperatures recorded in 2018 and 2019, together with the long-term averages (LTA) at TARC, WWAI, LFS and YAI.
